# Supplementary material for: COVID-19 Vaccine for Children: Vaccination Willingness of Parents and Its Associated Factors—A Network Analysis
Source: MDPI journal article supplement (doi:10.3390/vaccines10071155), 2022-07-20
Supplement: s1 [file s1]

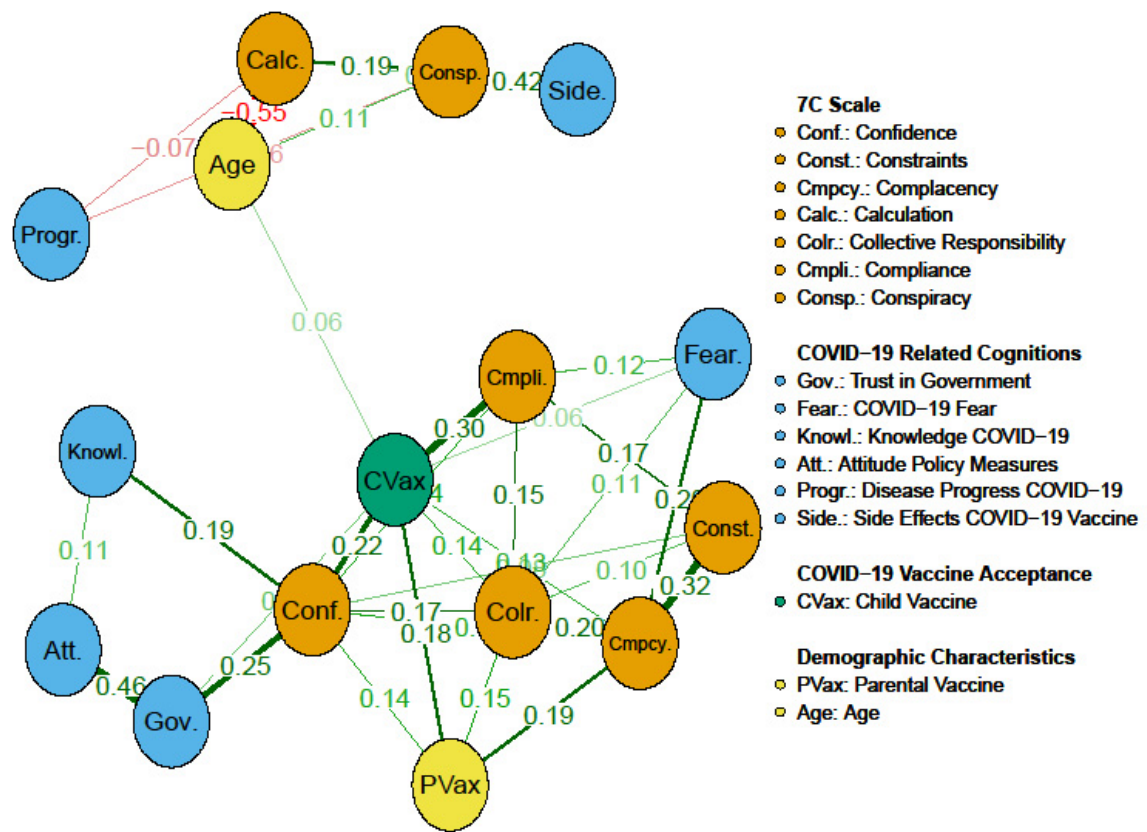

**Figure S1**  
Visualized MGM Network With Displayed Edge Weights

The abbreviations within the network display the nodes. The connections between those nodes are referred to as edges. The thickness of the edges represents the edge weight which is an indication of the strength of the edge. The thicker the edge, the higher the edge weight. Green edges represent positive associations, whereas red edges represent negative associations. The meaning of the variables' abbreviations can be seen on the right side of the network display.

**Figure S2**  
Correlation Stability Analysis of the Centrality Indices

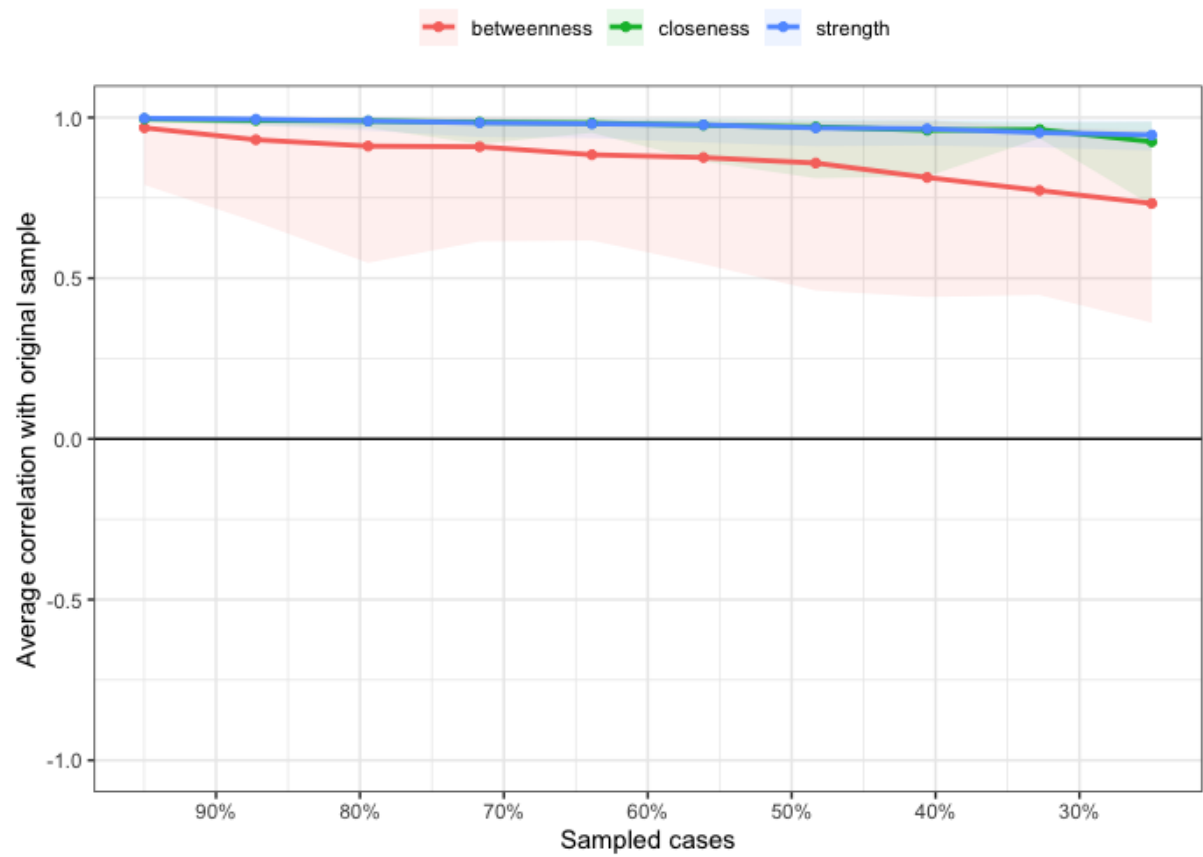

**Figure S3**  
Analysis of Edge Weight Variation

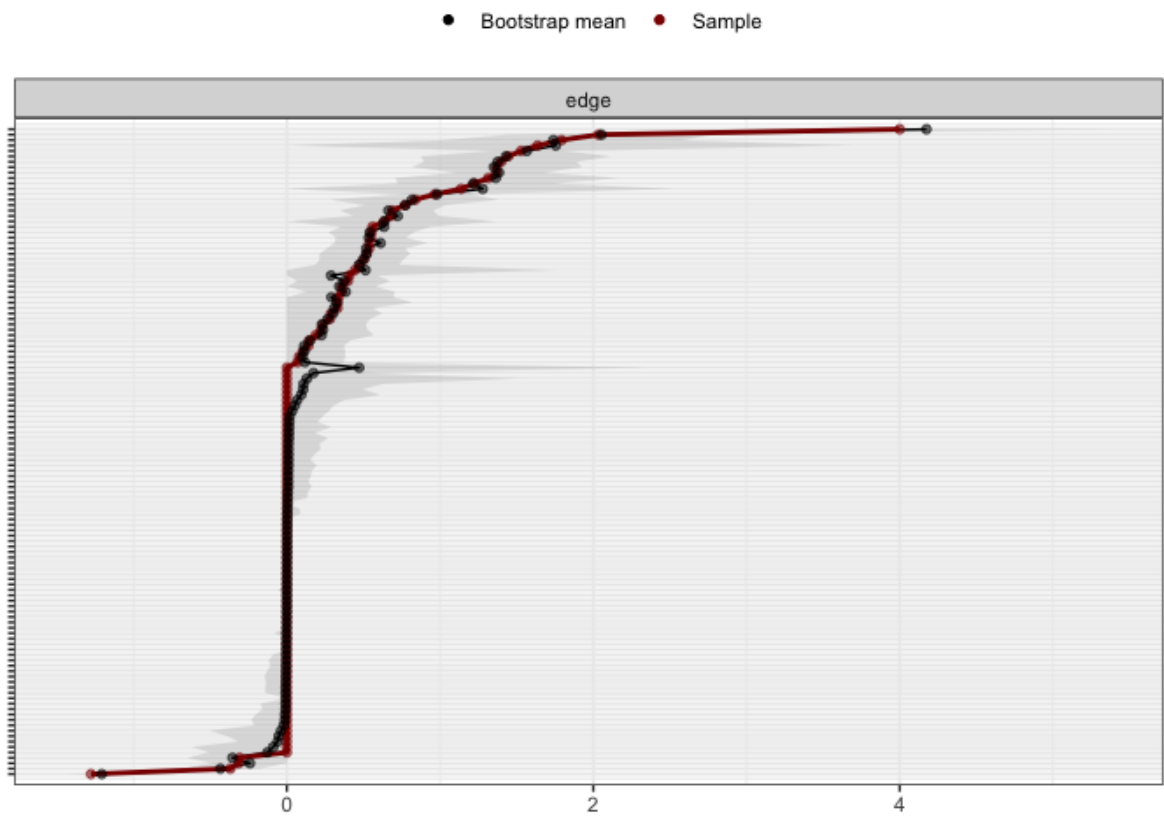

**Figure S4**  
Significance of Edge Weight Differences

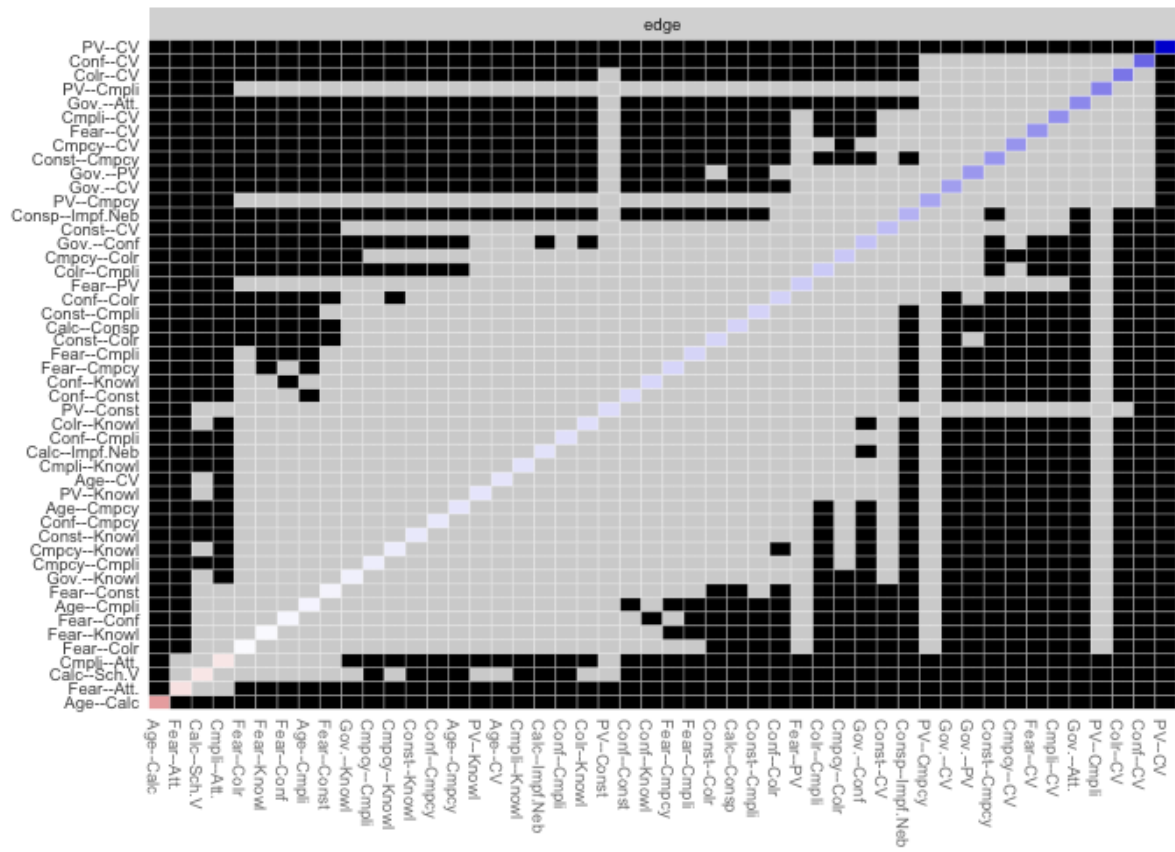

**Figure S5**

Significance of Node Strength Differences

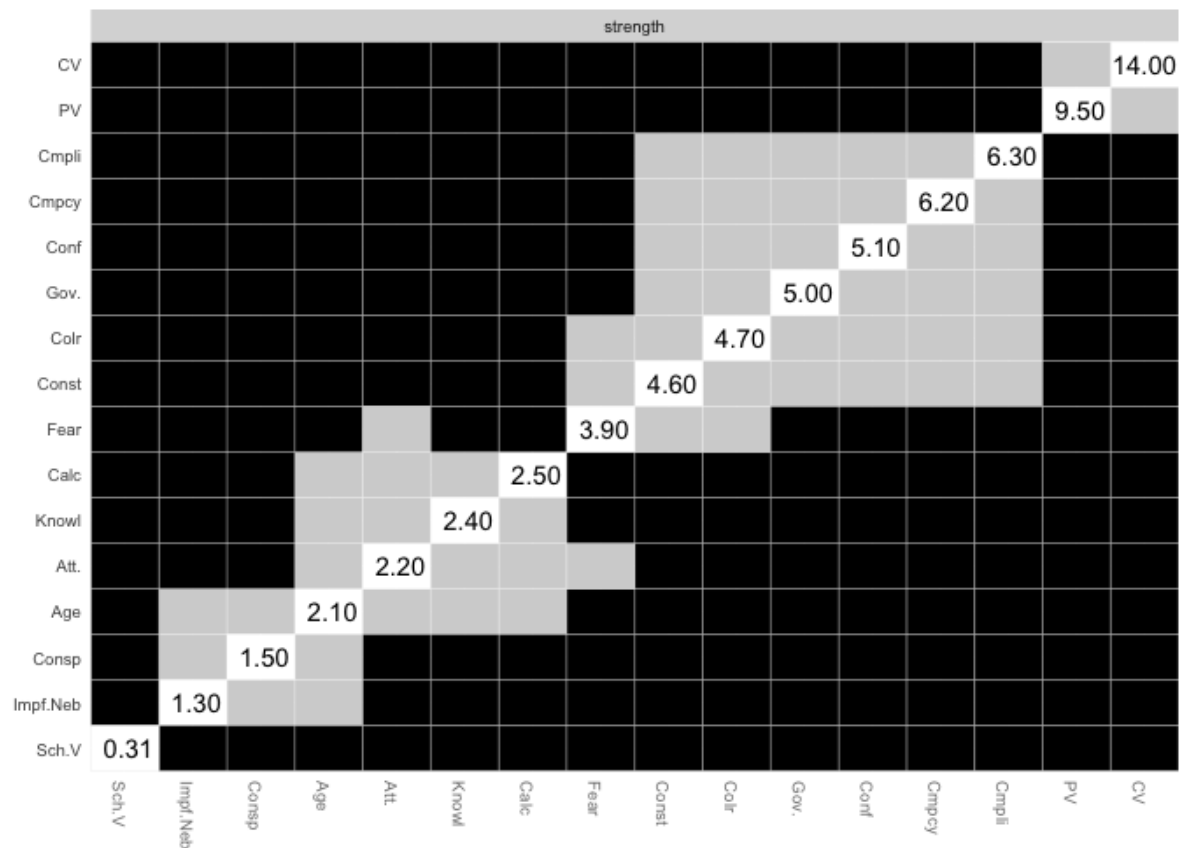**Table S1**

Distribution of Participants by Region (Germany, N = 2405)

| Bundesland             | N   | %    |
|------------------------|-----|------|
| Baden-Württemberg      | 325 | 13.5 |
| Bayern                 | 347 | 14.4 |
| Berlin                 | 101 | 4.2  |
| Brandenburg            | 38  | 1.6  |
| Bremen                 | 11  | 0.5  |
| Hamburg                | 71  | 3.0  |
| Hessen                 | 159 | 6.6  |
| Mecklenburg-Vorpommern | 16  | 0.7  |
| Niedersachsen          | 263 | 10.9 |
| Nordrhein-Westfalen    | 716 | 29.8 |
| Rheinland-Pfalz        | 106 | 4.4  |
| Saarland               | 22  | 0.9  |
| Sachsen                | 66  | 2.7  |
| Sachsen-Anhalt         | 28  | 1.2  |
| Schleswig-Holstein     | 113 | 4.7  |
| Thüringen              | 23  | 1.0  |
